# Supplementary material for: A Smartphone-Based Self-management Intervention for Bipolar Disorder (LiveWell): User-Centered Development Approach
Source: PubMed Central journal article supplement (PMC8076988; doi:10.2196/20424), 2021-04-12
Supplement: mental_v8i4e20424_app3.pdf [file mental_v8i4e20424_app3.pdf]

# LIVEWELL

Foundations

Check Ins

Daily Review

Wellness Plan

Instructions & Settings

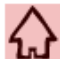

---

# FOUNDATIONS

1 - Overview

2 - Basic Facts About Bipolar

3 - Using Medications

4 - Lifestyle Skills

5 - Coping Skills

6 - Using a Team

7 - Being Aware

8 - Taking Action

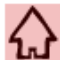

---

# CHECK INS

Daily Check In

Weekly Check In

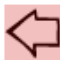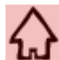

## DAILY CHECK INS

### Medications

|     |      |      |
|-----|------|------|
| All | Some | None |
|-----|------|------|

Went to bed

|      |   |
|------|---|
| 11pm | ⬇ |
|------|---|

Got up

|     |   |
|-----|---|
| 7am | ⬆ |
|-----|---|

### EWS

|      |    |
|------|----|
| Down | Up |
|------|----|

### Wellness

|    |    |    |    |   |    |    |    |    |
|----|----|----|----|---|----|----|----|----|
| -4 | -3 | -2 | -1 | 0 | +1 | +2 | +3 | +4 |
|----|----|----|----|---|----|----|----|----|

Save

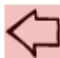

Weekly Survey  
Depressed Mood

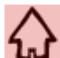

Over the past week, how often have you been bothered by the following problems?

Little interest or pleasure in doing things

Not at all

Several days

More than half the days

Nearly every day

Next

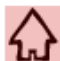

---

# DAILY REVIEW

Medications

Sleep

Routine

EWS

Wellness

Charts

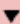

Exit LiveWell

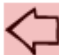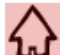

## My Medications

**Name:** Lithium

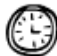

**Amount:** 600mg

**When:** Every morning

**Name:** Lithium

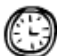

**Amount:** 300mg

**When:** Every night

**Name:** Lithium

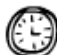

**Amount:** 15mg

**When:** Every morning

**Name:** Lithium

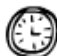

**Amount:** 1.0 oz

**When:** At night, as needed  
for insomnia

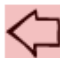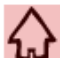

# CHARTS

Show  
Weeks

Show  
Months

| AUGUST              | 1<br>Mon | 2<br>Tue | 3<br>Wed | 4<br>Thu | 5<br>Fri | 6<br>Sat | 7<br>Sun |
|---------------------|----------|----------|----------|----------|----------|----------|----------|
| Early Warning Signs |          |          |          |          |          |          |          |
| Wellness            |          |          |          |          |          |          |          |
| Medications         |          |          |          |          |          |          |          |
| Sleep               |          |          |          |          |          |          |          |
| Routine             |          |          |          |          |          |          |          |

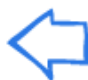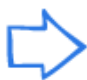

Details

Widget with  
randomly  
rotating details  
graphs  
thumbnail here



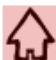

# WELLNESS PLAN

My Resources

Reduce Risk

Awareness & Action

My Medications

My Skills

My Team



# WELLNESS PLAN

My Resources

Reduce Risk

Awareness & Action

|               |                                                                                                                            |
|---------------|----------------------------------------------------------------------------------------------------------------------------|
| Blueprint     | Exercise at least three times per week<br>Continue attending weekly group therapy<br>Spend more time out of my house       |
| Abstinence    | Limit coffee intake to one cup per day<br>Avoid triggers that lead to smoking again<br>Limit drinking to special occasions |
| Sleep         | Turn off TV in my bedroom<br>Force myself out of bed when I'm feeling down<br>Get at least 6-8 hours of sleep per night    |
| Interpersonal | Attend social gatherings in my neighborhood<br>Spend more time with family<br>Limit interactions with negative coworkers   |
| Calm          | Get rid of clutter in my home<br>Create a payment plan for unpaid medical bills<br>Read more                               |

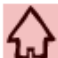

# WELLNESS PLAN

My Resources

Reduce Risk

Awareness & Action

Be Aware

Take Action

+4 Severe Up

Call your psychiatrist.  
Call 911.  
Go to the hospital.

+3 Moderate Up

Take medications daily. Use lifestyle and coping skills.  
Use supports.  
Call your psychiatrist.  
Consider more intensive treatment.

+2 Mild Up

Take medications daily.  
Use lifestyle skills.  
Use coping skills.  
Use supports. Work more closely with your psychiatrist.

+1 Slight Up

Take medications daily.  
Watch closely.  
Check for early warning signs.  
Manage triggers with lifestyle skills.

+0 Balanced

Take medications daily.  
Maintain a healthy lifestyle.

-1 Slight Down

Take medications daily.  
Watch closely.  
Check for early warning signs.  
Manage triggers with lifestyle skills.

-2 Mild Down

Take medications daily.  
Use lifestyle skills.  
Use coping skills.  
Use supports. Work more closely with your psychiatrist.

-3 Moderate Down

Take medications daily. Use lifestyle and coping skills.  
Use supports.  
Call your psychiatrist.  
Consider more intensive treatment.

-4 Severe Down

Call your psychiatrist.  
Call 911.  
Go to the hospital.

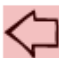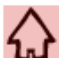

## My Team

### My Doctor

**Name**

(XXX) XXX-XXXX

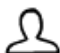

### Other Mental Health Providers

**Name**

(XXX) XXX-XXXX

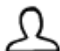

### My Pharmacy

**Name**

(XXX) XXX-XXXX

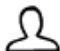

### My Hospital

**Name**

(XXX) XXX-XXXX

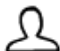

### My Family

**Name**

(XXX) XXX-XXXX

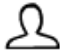

### My Friends

**Name**

(XXX) XXX-XXXX

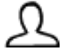

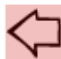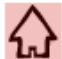

---

# My Skills

---

I. Fundamentals of Skills +

---

II. Lifestyle Skills -

---

A. Blueprint +

---

B. Abstinence +

---

C. Sleep -

---

Three day challenge ≥

---

Clean castle ≥

---

Worry pad ≥

---

Worry chair ≥

---

Imagery ≥

---

D. Interactions +

---

E. Calm +

---

III. Coping Skills +

---

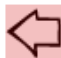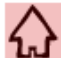

---

## Settings & Instructions

---

I. Introduction [+](#)

---

II. Schedule [+](#)

---

III. Reminders [+](#)

---

IV. Settings [+](#)

---

V. Coach [+](#)

---

VI. Psychiatrist [+](#)

---

VII. Foundations [+](#)

---

VIII. Check Ins [-](#)

---

A. Daily [-](#)

---

Wellness rating [≥](#)

---

Early warning signs [≥](#)

---

Medications [≥](#)

---

Sleep [≥](#)

---

B. Weekly [+](#)

---

IX. Daily Review [+](#)

---

X. Charts [+](#)

---

XI. Wellness Plan [+](#)

---

XII. FAQs [+](#)

---
